# Supplementary material
Source: Research Square preprint supplement (doi:10.21203/rs.3.rs-8987177/v1)
Supplement: Supplementary file 1 [file ac29ee01b96b6e26f50c0473.docx]

**Supplementary materials**


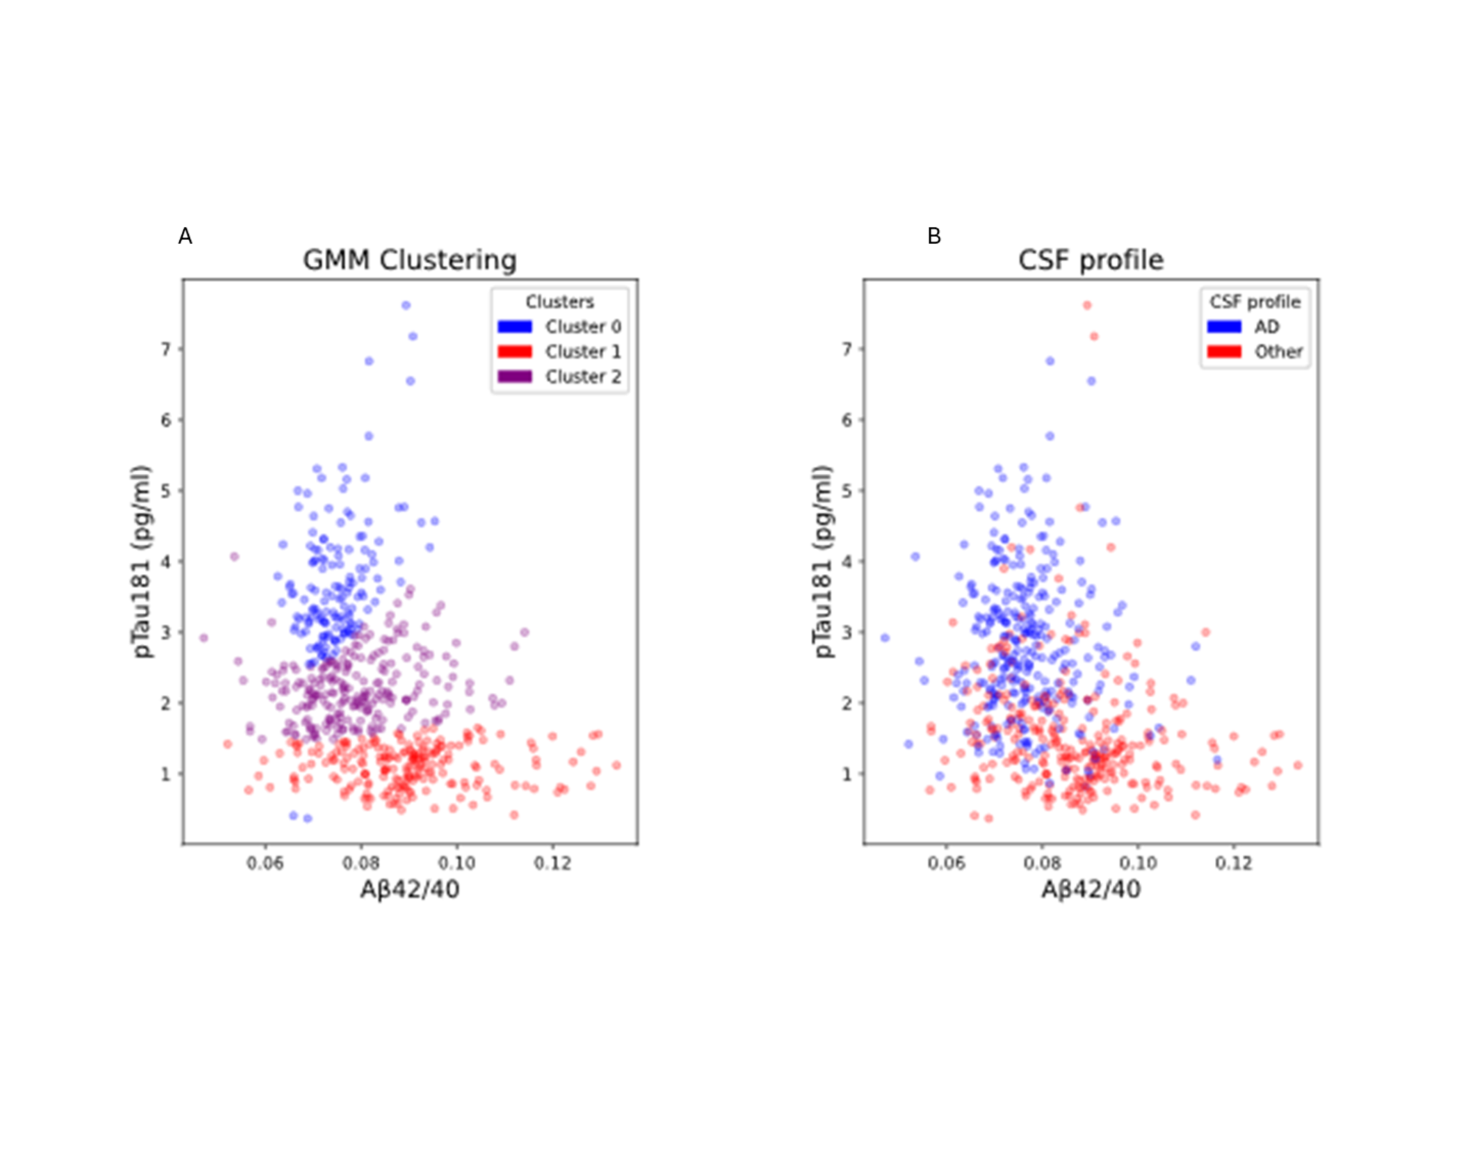


**Supplementary Figure 1.: Unrestrained clustering representation and confront to CSF AD profile distribution in UniPg cohort**

A, clustering results based on plasma Aβ42/40 (b_ab42/40) and pTau181 values alone; B, distribution of CSF-defined AD diagnosis (i.e. A+/T+). GMM: Gaussian Mixture Model; AD: Alzheimer’s Disease.

| 1. **Aβ42/40+pTau181** | **Clinical suspect of AD** | | **AD CSF profile** | **non-AD CSF profile** |
| --- | --- | --- | --- | --- |
| **Cluster 0** | 75% | 87% | | 13% |
| **Cluster 1** | 34% | 15% | | 85% |
| **Cluster 2** | 52.4% | 58% | | 42% |
|  |  |  | |  |
| **b) pTau217** | **Clinical suspect AD** | **AD CSF profile** | | **Other CSF profile** |
| **Cluster 1** | 34% | 14.1% | | 85.9% |
| **Cluster 2** | 68.6% | 85% | | 15% |

**Supplementary Table 1: Prevalence of AD clinical suspect and AD CSF profile in clusters in UniPg cohort.**

1. prevalence of CSF-confirmed AD diagnosis in clusters generated according to plasma Aβ42/40 and pTau181 values.
2. prevalence of CSF-confirmed AD diagnosis in clusters generated according to plasma pTau217 values with cluster number forced to two.

| **a) Groups** | **A+/T+** | **A+/T-** | **A-/T+** | **A-/T-** | **KD** |
| --- | --- | --- | --- | --- | --- |
| **preAD** | 96.7% | 3.3% | 0% | 0% | 1 |
| **AD-MCI** | 100% | 0% | 0% | 0% | 13 |
| **ADdem** | 100% | 0% | 0% | 0% | 12 |
| **PD-CN** | 2.5% | 2.5% | 17.5% | 77.5% | 2 |
| **PD-MCI** | 11.1% | 18.5% | 11.1% | 59.3% | 0 |
| **PDD/DLB** | 53% | 17.6% | 0% | 29.4% | 0 |
| **FTD** | 6.3% | 18.8% | 18.8% | 56.3% | 3 |
| **OND** | 0% | 57.6% | 12.1% | 30.3% | 5 |
| **CTRL** | 0% | 11.4% | 19.3% | 69.3% | 9 |

| **b) Groups** | **A+/T+** | **A+/T-** | **A-/T+** | **A-/T-** |
| --- | --- | --- | --- | --- |
| **AD-MCI** | 97.4% | 2.6% | 0% | 0% |
| **ADdem** | 92.7% | 7.3% | 0% | 0% |
| **PDD/DLB** | 0% | 100% | 0% | 0% |
| **OND** | 0% | 57.1% | 14.3% | 28.6% |
| **CTRL** | 0% | 42.9% | 0% | 57.1% |

**Supplementary Table 2: CSF A/T profiles across diagnostic groups and renal impairment in a) UniPg cohort and b) UniPa cohort.**

preAD: preclinical Alzheimer’s Disease; AD-MCI: Mild Cognitive Impairment due to Alzheimer’s Disease; ADdem: dementia due to Alzheimer’s Disease; PD-CN: cognitively unimpaired Parkinson’s Disease; PD-MCI: Parkinson’s Disease with Mild Cognitive Impairment; PDD/DLB: Parkinson’s Disease Dementia/Dementia with Lewy Bodies; FTD: Fronto-Temporal Dementia; OND: Other Neurological Disease; CTRL: subjects without specific pathological phenotypes and with a non-AD CSF profile; A+/T+: % of patients with CSF with an A+/T+ CSF profile; A+/T-: % of patients with CSF with an A+/T- CSF profile; A-/T+: % of patients with CSF with an A-/T+ CSF profile; A-/T-: % of patients with CSF with an A-/T- CSF profile; KD: number of patients with known renal impairment (i.e. eGFR<60 mL/min).
